# Supplementary material for: A pH, thermal and light triple-stimuli responsive micellar solution formed by a cationic surfactant and trans-o-hydroxycinnamic acid
Source: Royal Society of Chemistry journal article supplement (doi:10.1039/d1sm00884f), 2021-01-01
Supplement: d1sm00884f1.pdf [file d1sm00884f1.pdf]

## Supporting information

### pH, thermal and light triple-stimuli responsive micellar solution formed by a cationic surfactant and *trans*-*o*-hydroxycinnamic acid

Dongmei Lv, Qi Liu, Huijun Wu, Yiyao Cheng, Chenyong Wang, Baolin Yin, Xilian Wei\* Jing Li\*

Shandong Provincial Key Laboratory of Chemical Energy Storage and Novel Cell Technology, College of Chemistry and Chemical Engineering, Liaocheng University, Liaocheng, Shandong 252059, P. R. China

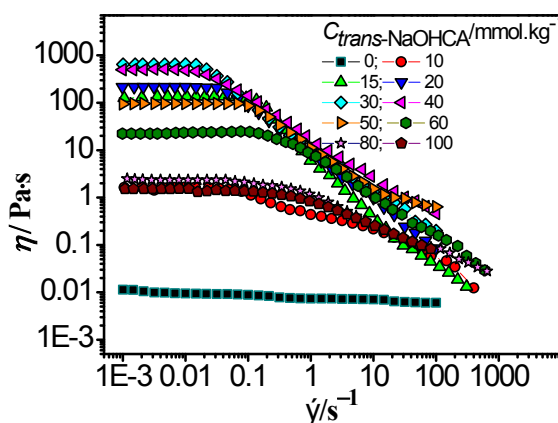

Fig. S1. Steady-state viscosity curves as a function of the *trans*-OHCA concentration for R<sub>16</sub>HTAB at 40 mM and at 25 °C

- 
1. E-mail: weixilian@126.com
  2. E-mail: muzianty@126.com

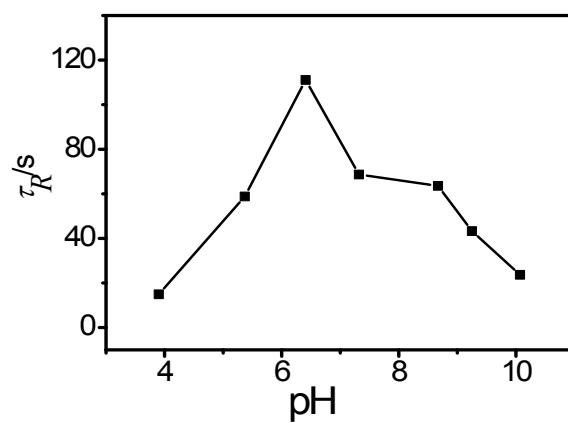

Fig. S2. Variation of  $\tau_R$  for 40 mM  $R_{16}$ HTAB/ *trans*-OHCA solutions at different pH values at 25 °C

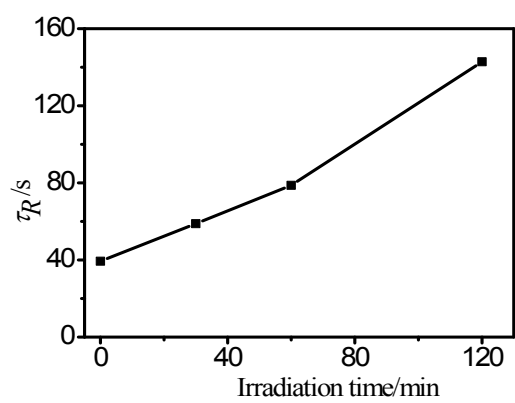

Fig. S3. Relaxation time  $\tau_R$  vs UV irradiation time at 25 °C
